# Supplementary material for: Photoreversible stretching of a BAPTA chelator marshalling Ca2+-binding in aqueous media
Source: publisher site journal article supplement (doi:10.3762/bjoc.15.273), 2019-11-21
Supplement: Additional file 1 [file 1860-5397-15-273-S1.pdf]

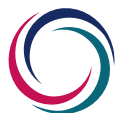

## Supporting Information

for

### Photoreversible stretching of a BAPTA chelator marshalling $\text{Ca}^{2+}$ -binding in aqueous media

Aurélien Ducrot, Arnaud Tron, Robin Bofinger, Ingrid Sanz Beguer, Jean-Luc Pozzo and Nathan D. McClenaghan

*Beilstein J. Org. Chem.* **2019**, *15*, 2801–2811. doi:10.3762/bjoc.15.273

### Electronic absorption spectra, NMR and mass spectra

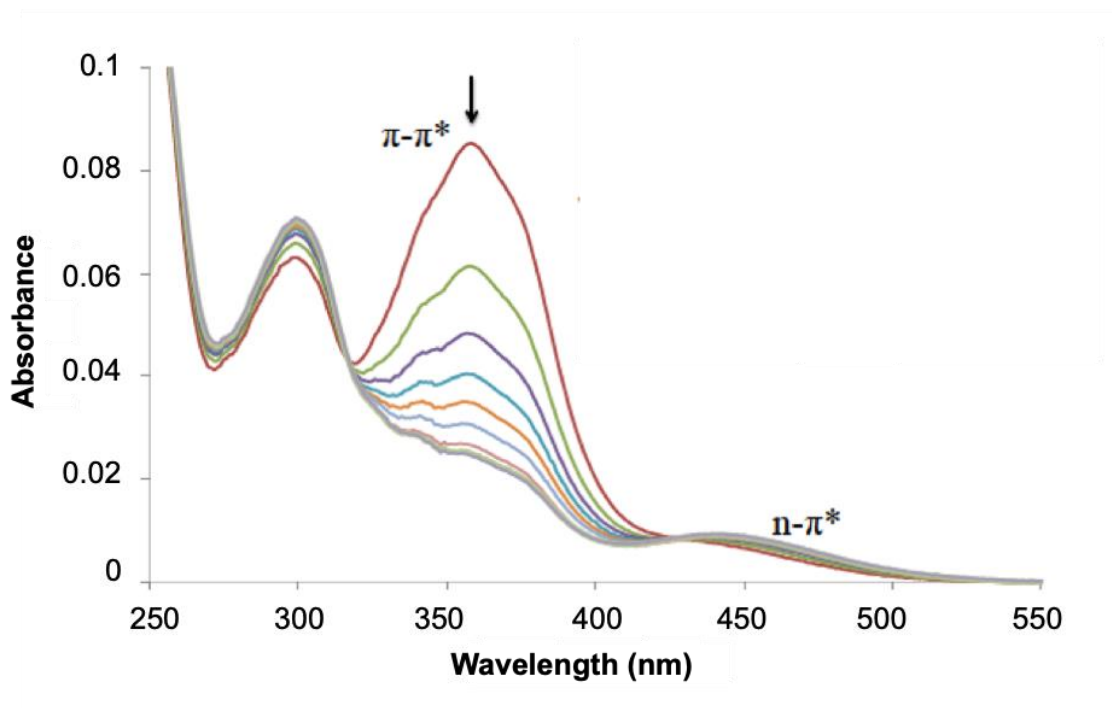

**Figure S1:** Electronic absorption spectra of **1fE** at a concentration of 40  $\mu\text{M}$  in  $\text{CH}_3\text{CN}$ . Upon irradiation at 365 nm, the decrease of the  $\pi-\pi^*$  band and the increase of the  $n-\pi^*$  band via changes at 362 nm and 460 nm, respectively, were observed.

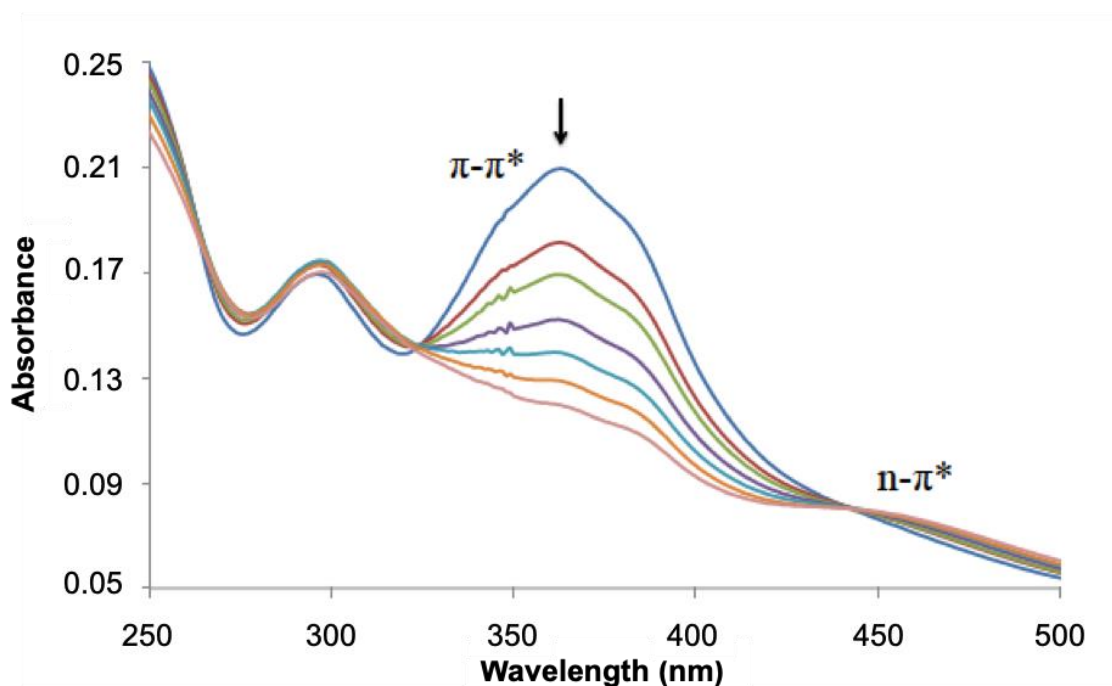

**Figure S2:** Electronic absorption spectra of **1E** at a concentration of 40  $\mu\text{M}$  in 0.03 M MOPS buffer at pH 7.2 in the presence of KCl (0.1 M), EGTA (0.011 M) and  $\text{Ca}^{2+}$  (4.4 mM). Upon irradiation at 365 nm, the decrease of the  $\pi-\pi^*$  band and the increase of the  $n-\pi^*$  band via changes at 362 nm and 460 nm, respectively, were observed.

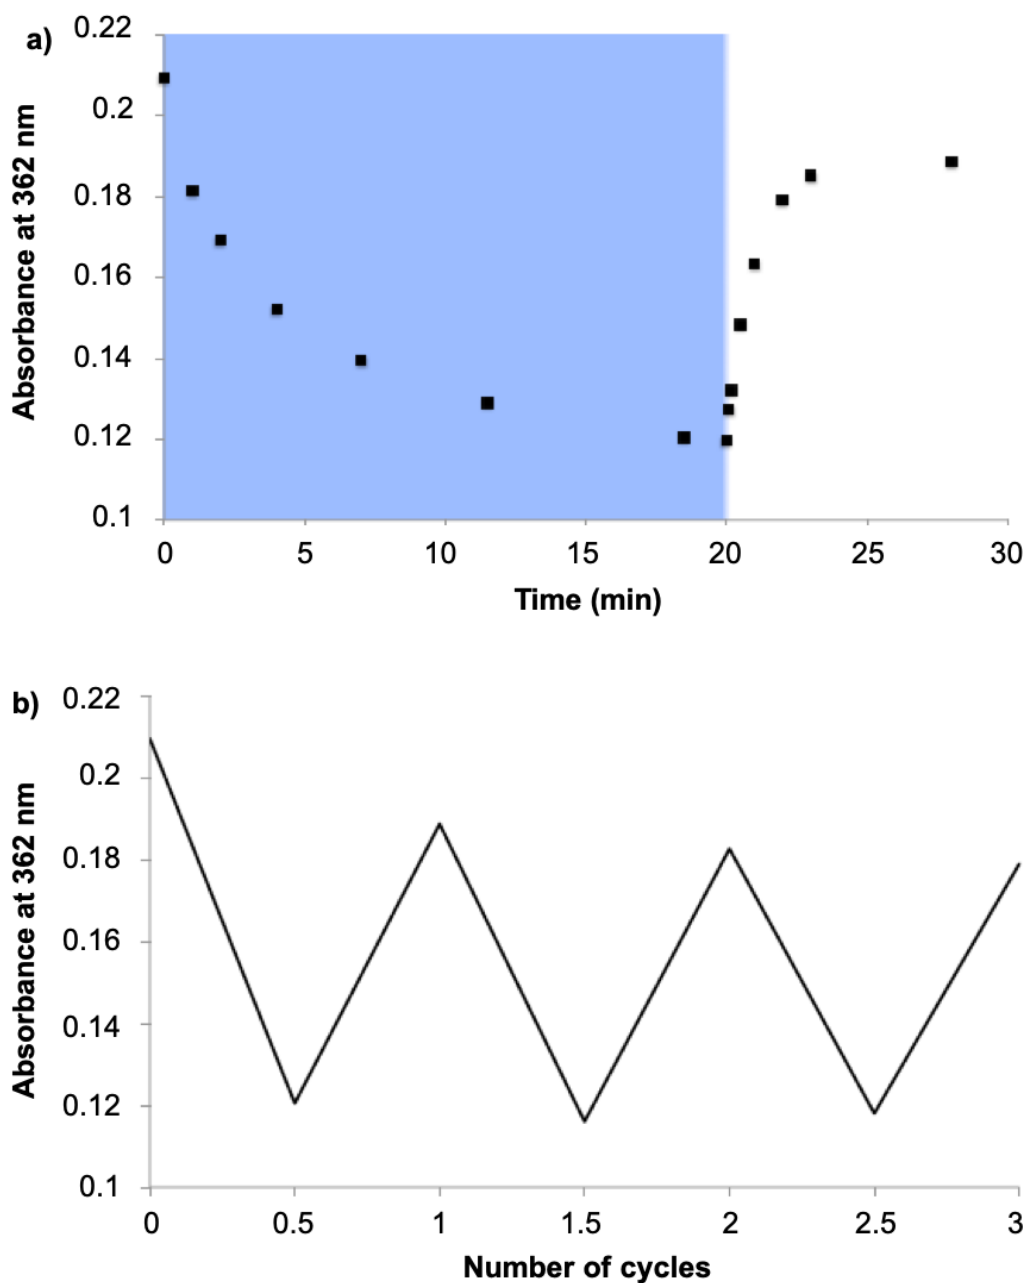

**Figure S3:** a) Multiple *trans/cis*-cycles of **1E** (40  $\mu$ M) indicated by absorption changes at 362 nm, in aqueous 0.03 M MOPS buffer at pH 7.2 in the presence of KCl (0.1 M), EGTA (0.011 M) and  $\text{Ca}^{2+}$  (4.4 mM). Each cycle corresponds to irradiation at 365 nm (blue), followed by thermal return at room temperature (white). b) Fatigue study of **1E** in the presence of calcium after 3 cycles.

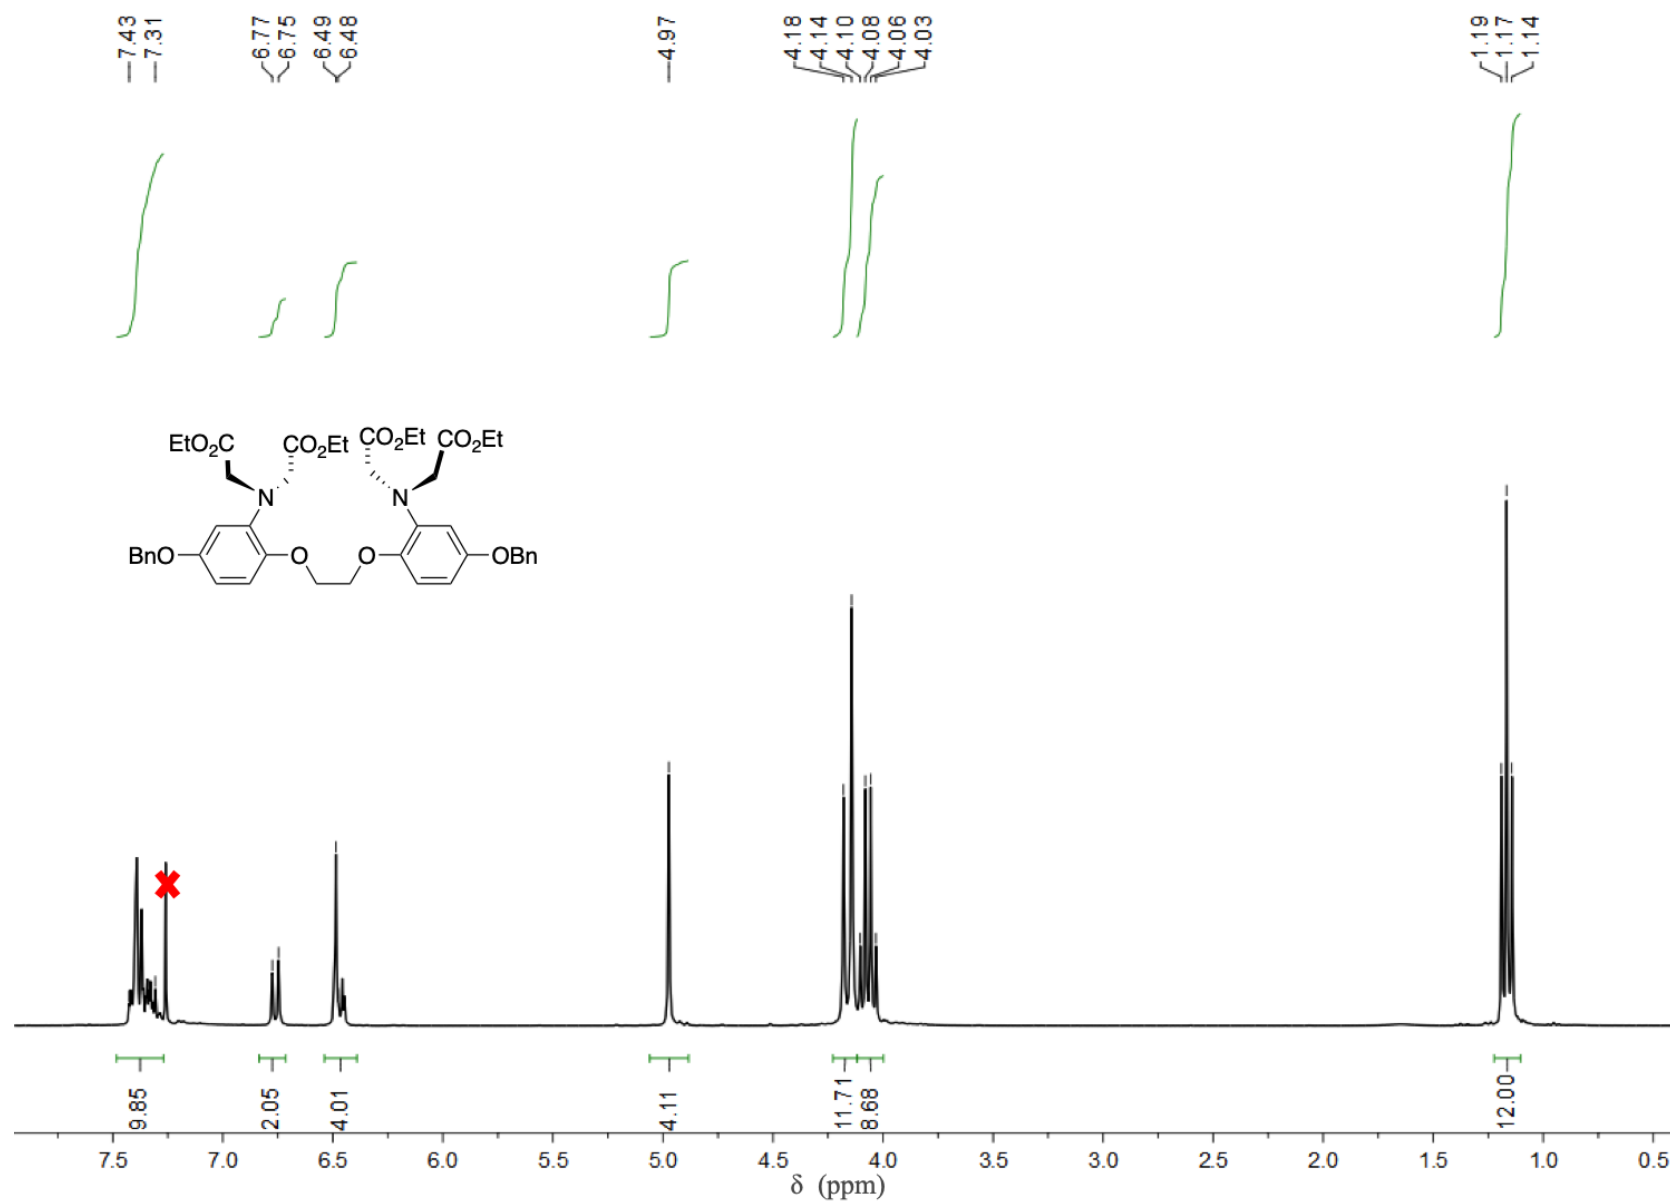

**Figure S4:** <sup>1</sup>H NMR spectrum of the **1b** in CDCl<sub>3</sub> at 298 K on a 300 MHz spectrometer (red X corresponds to chloroform).

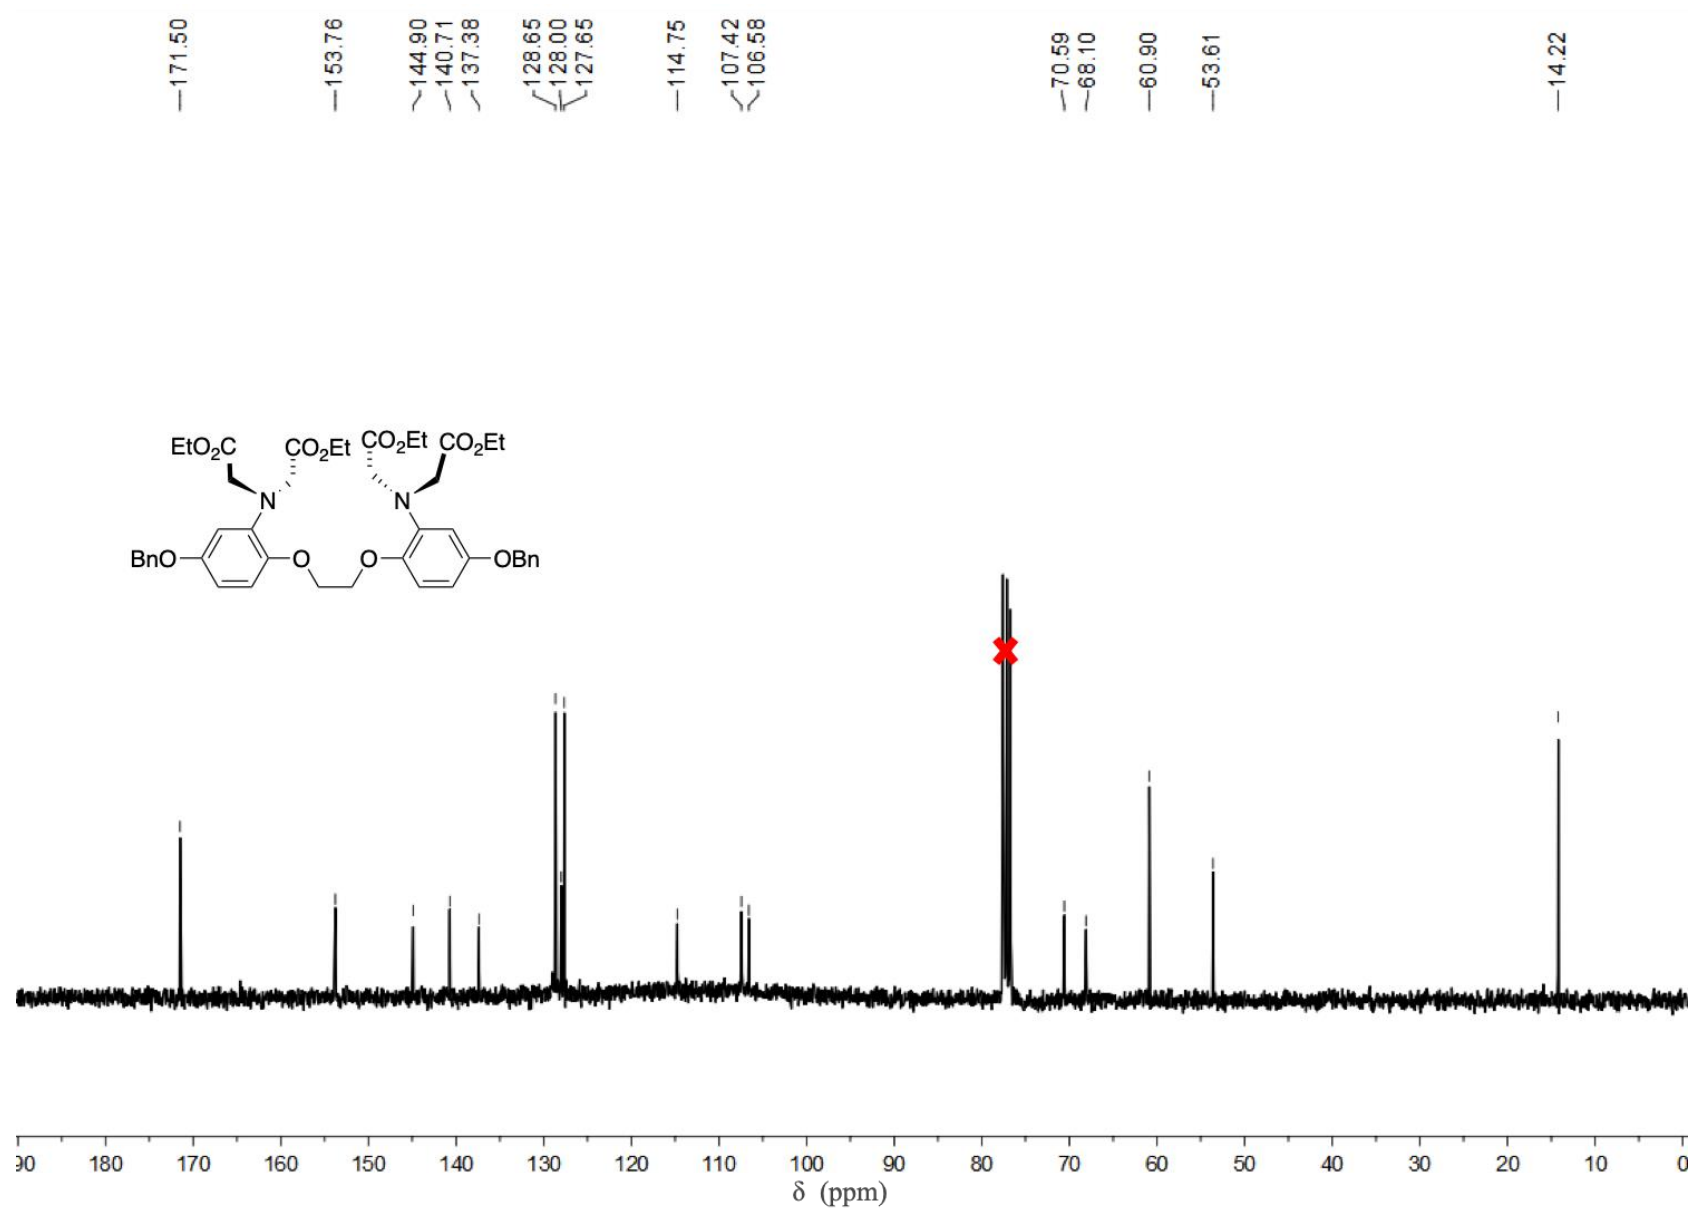

**Figure S5:** <sup>13</sup>C NMR spectrum of the **1b** in CDCl<sub>3</sub> at 298 K on a 300 MHz spectrometer (red X corresponds to chloroform).

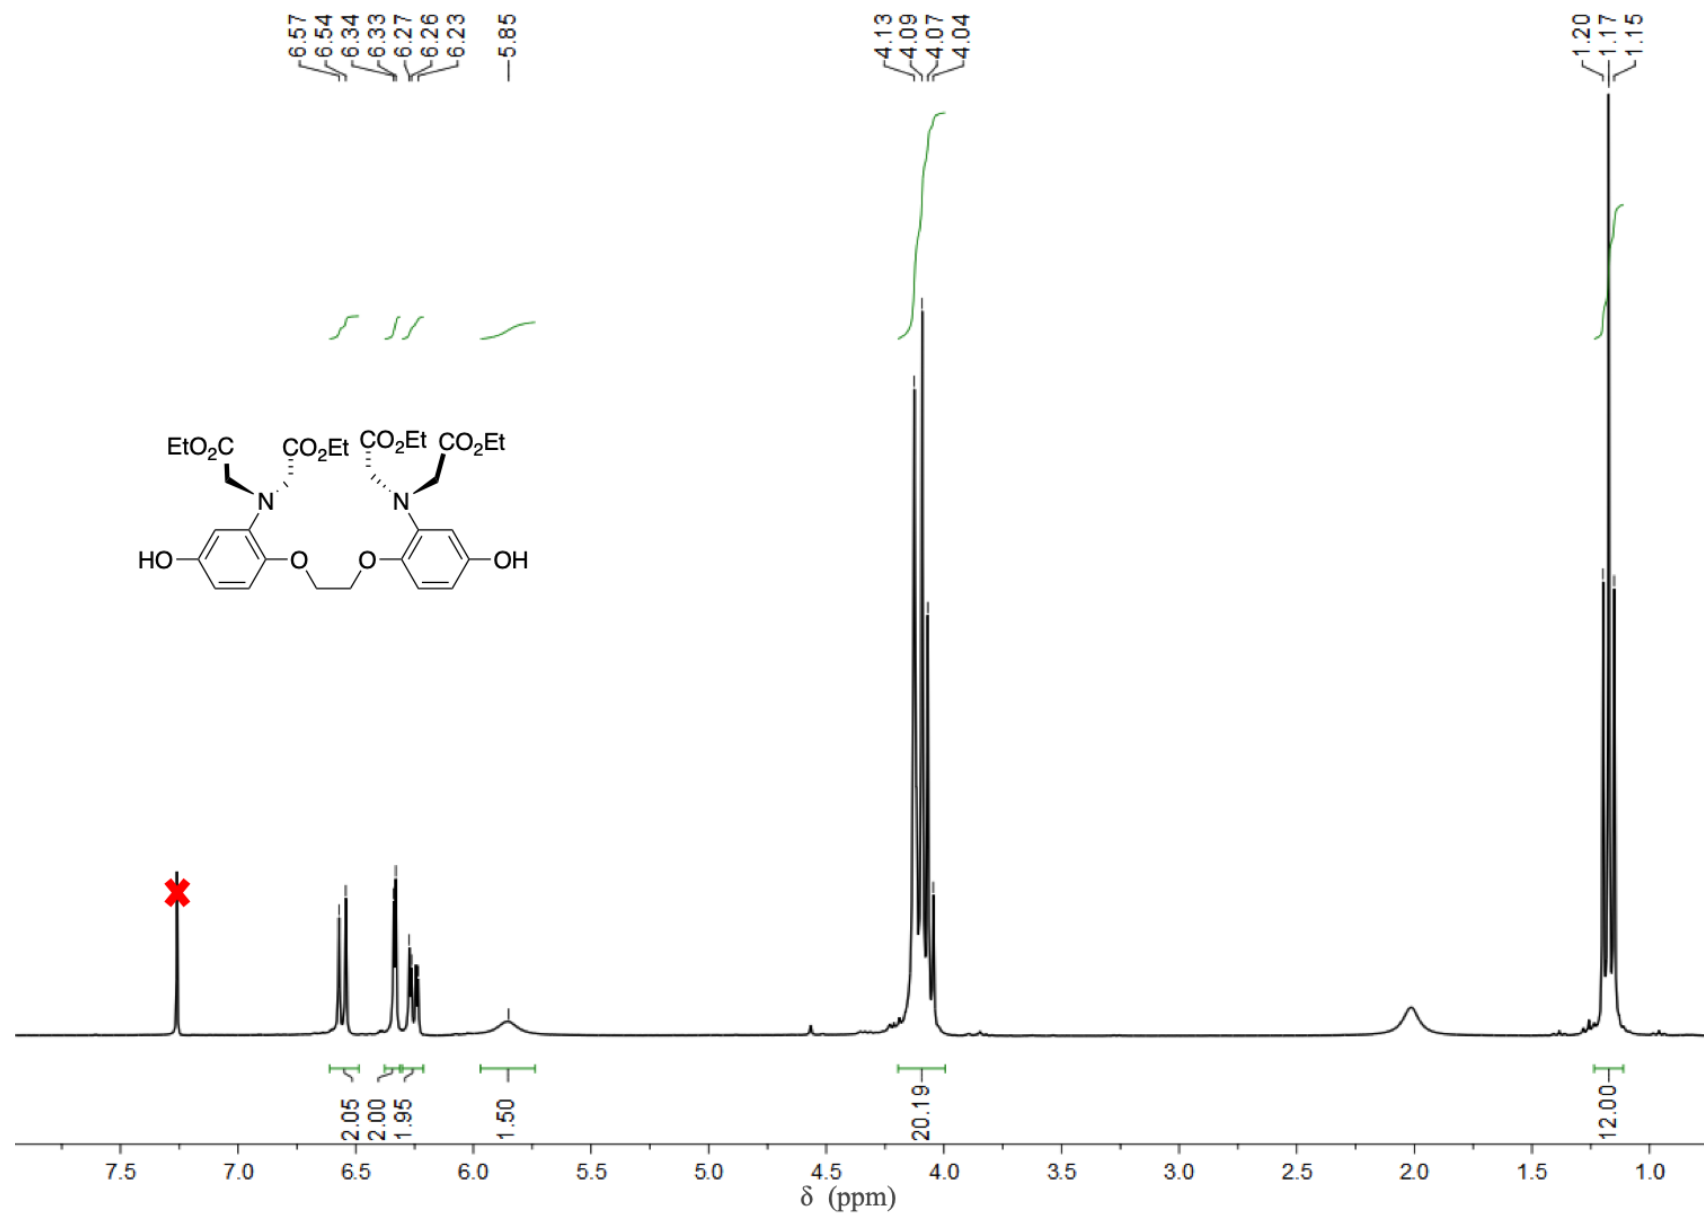

**Figure S6:**  $^1\text{H}$  NMR spectrum of the **1c** in  $\text{CDCl}_3$  at 298 K on a 300 MHz spectrometer (red X corresponds to chloroform).

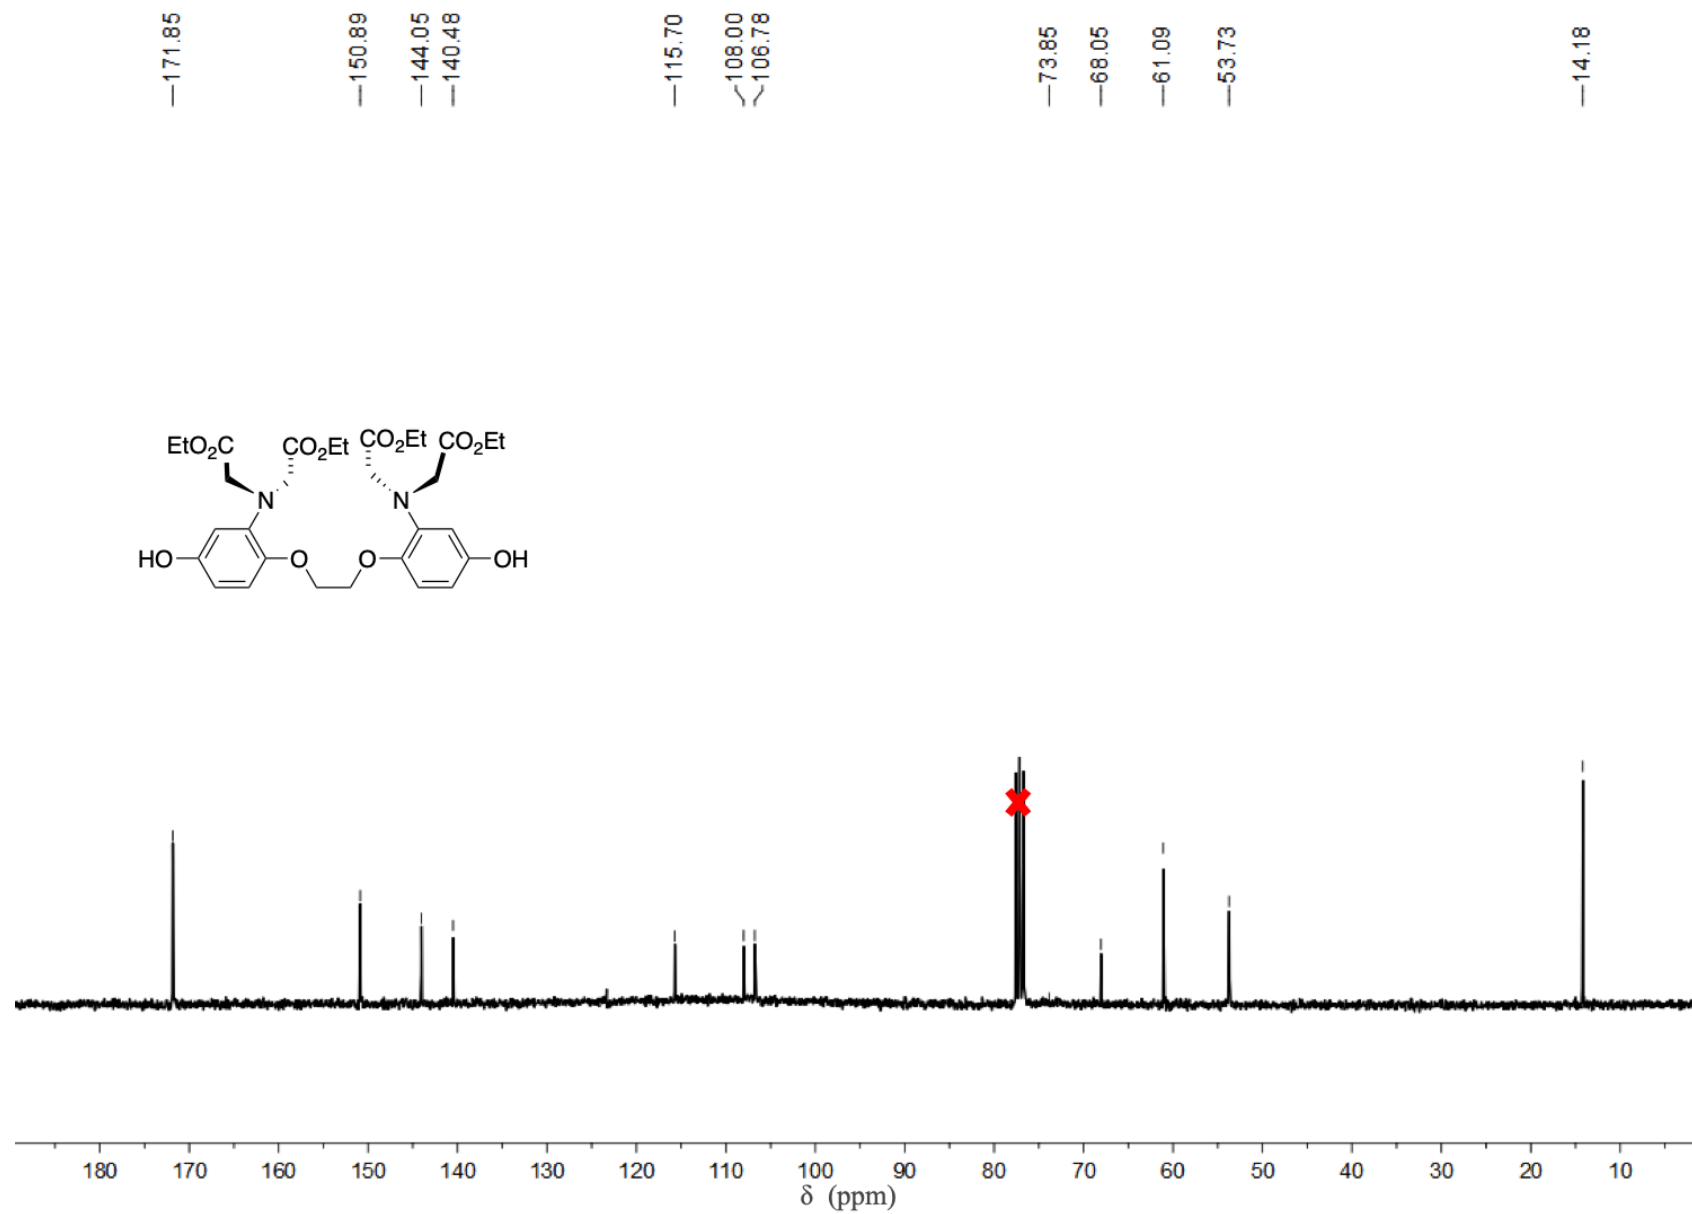

**Figure S7:** <sup>13</sup>C NMR spectrum of the **1c** in CDCl<sub>3</sub> at 298 K on a 300 MHz spectrometer (red X corresponds to chloroform).

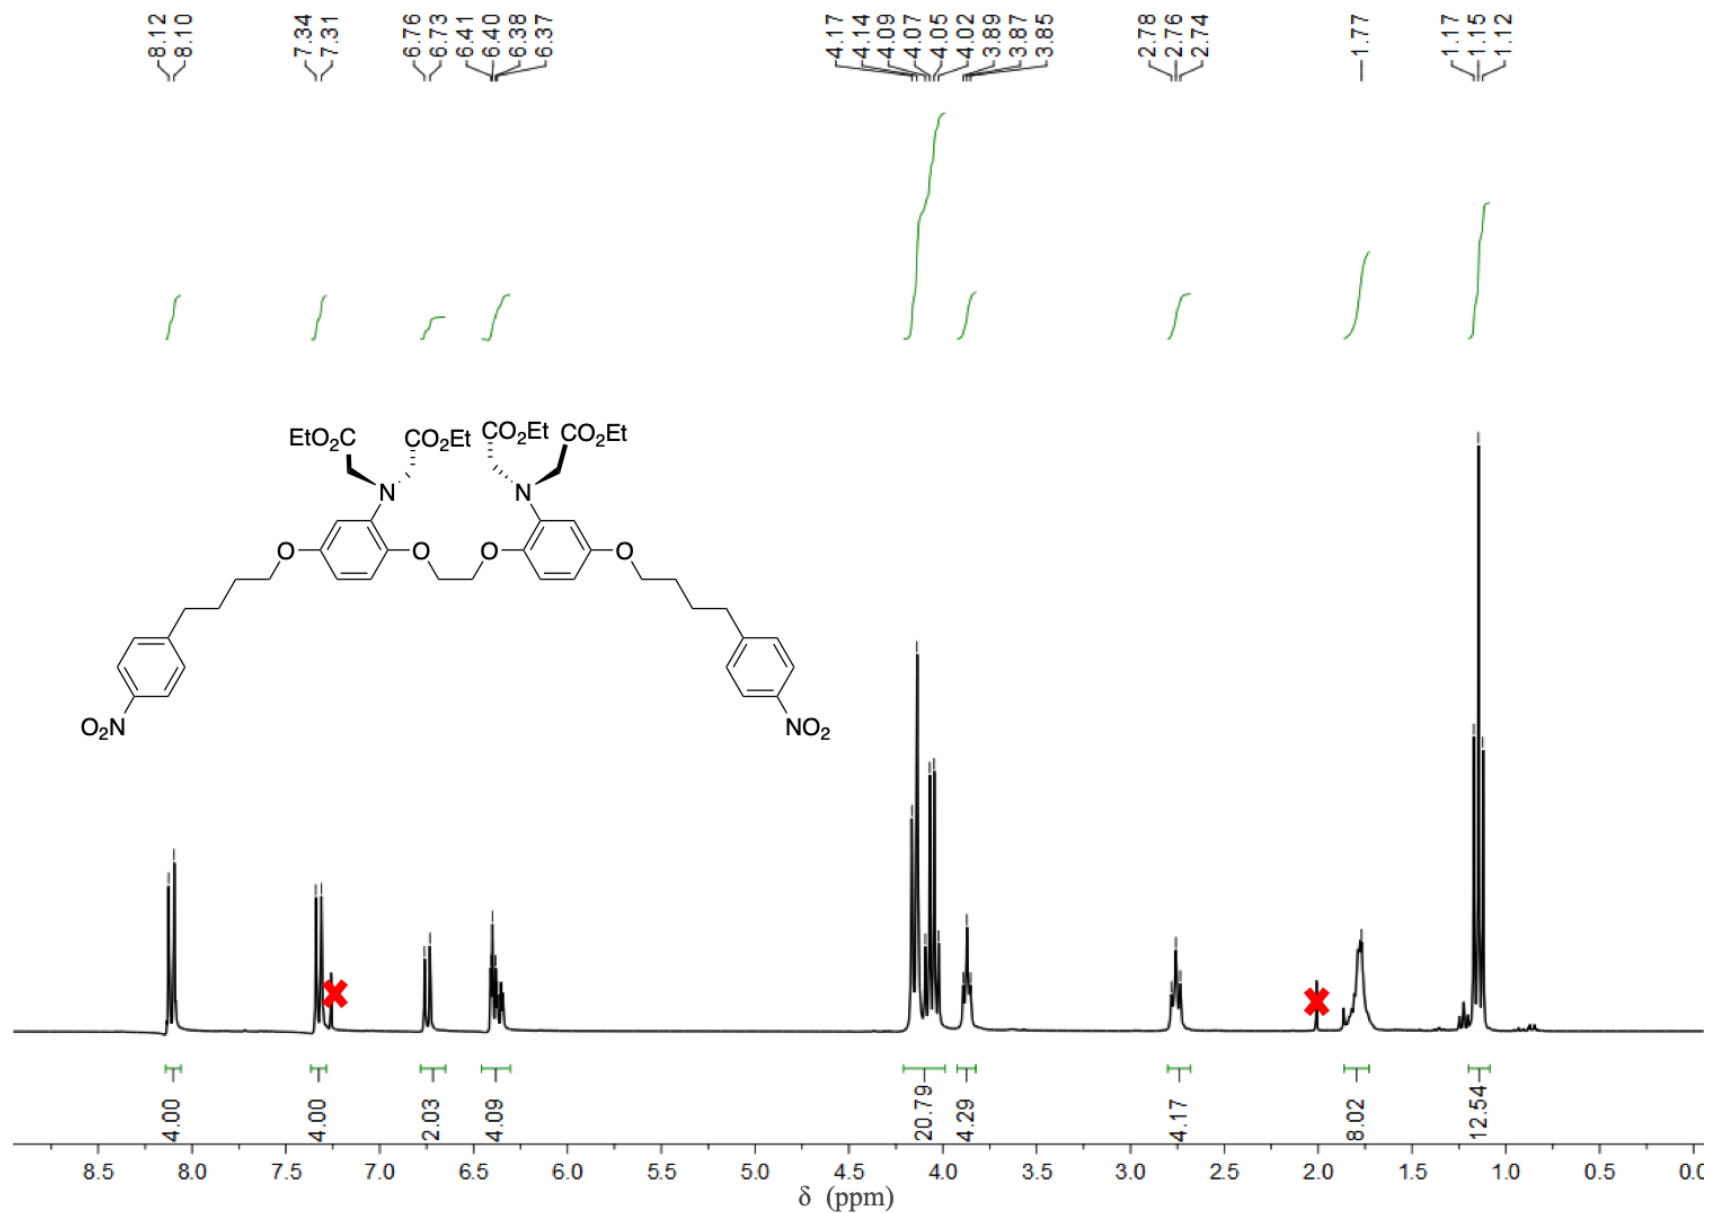

**Figure S8:**  $^1\text{H}$  NMR spectrum of the **1d** in CDCl<sub>3</sub> at 298 K on a 300 MHz spectrometer (red X corresponds to chloroform and acetone).



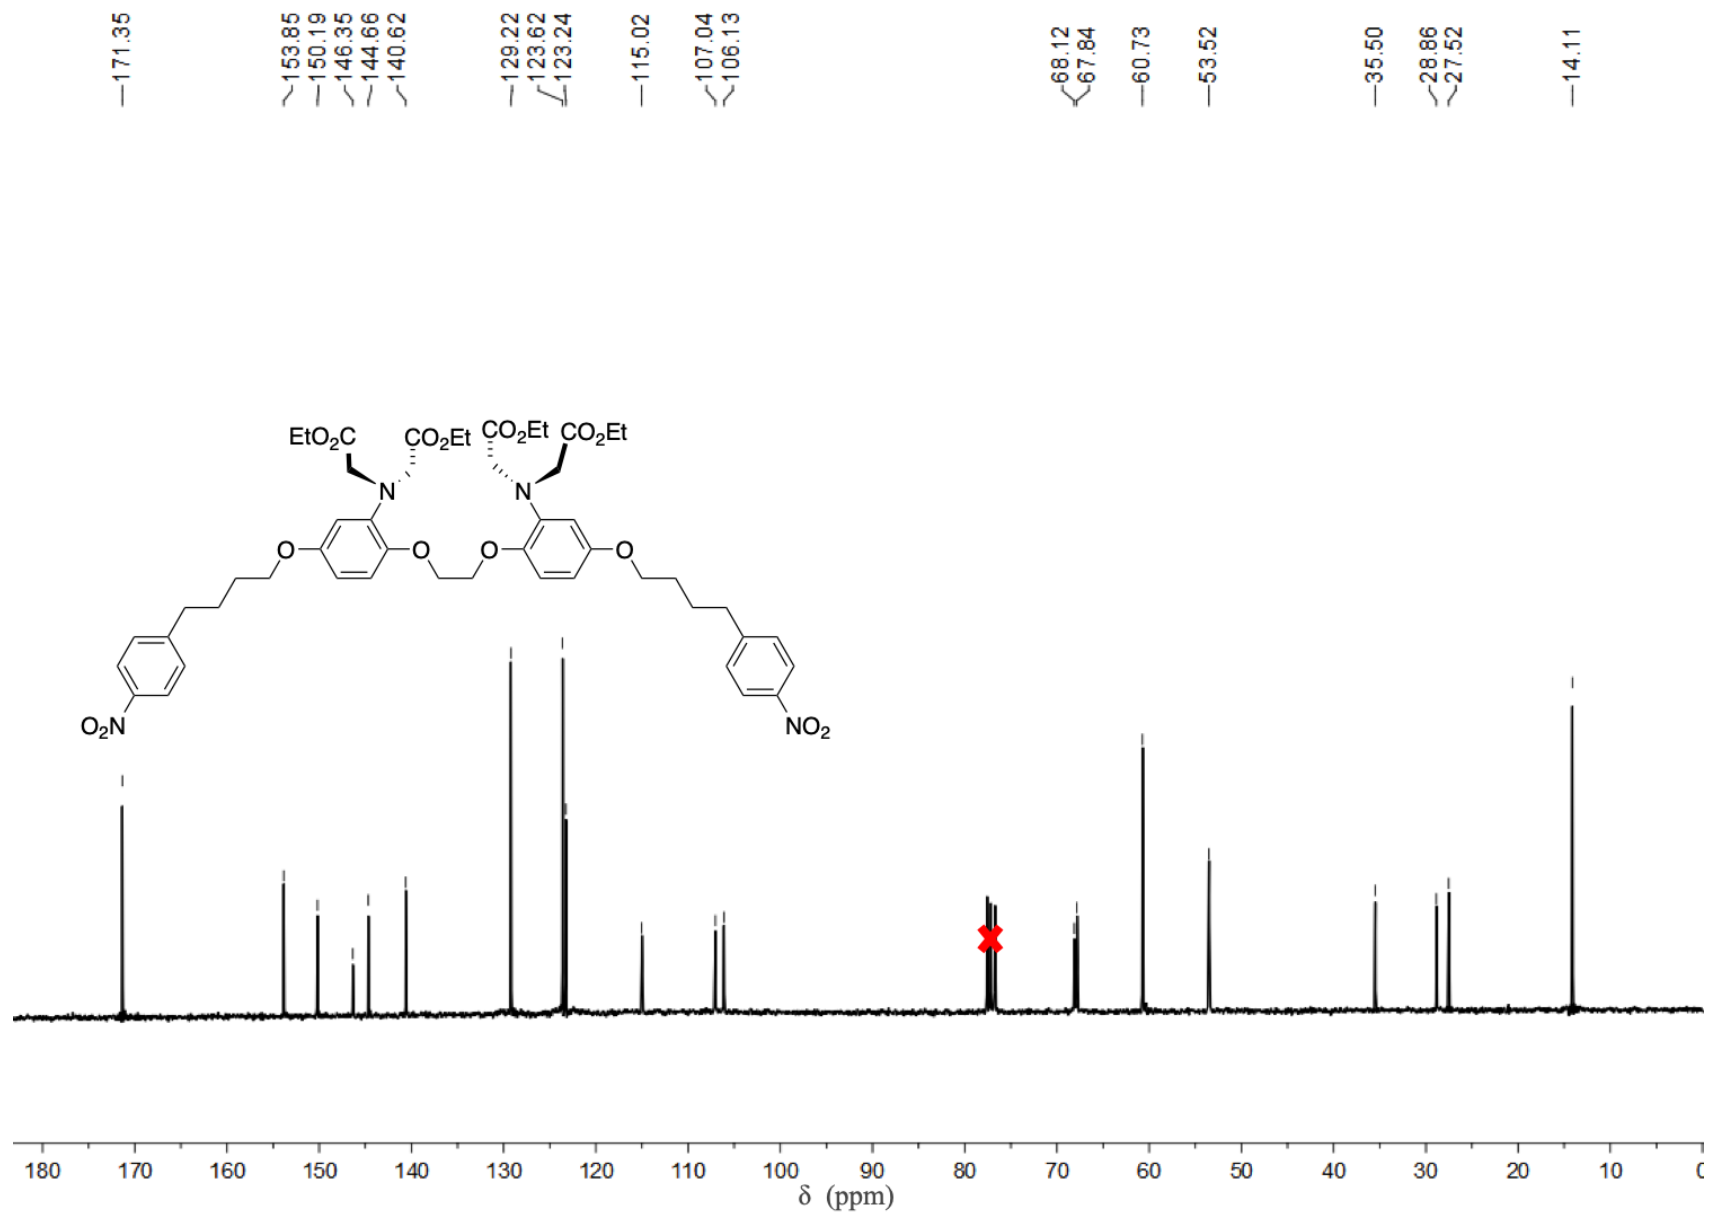

**Figure S9:** <sup>13</sup>C NMR spectrum of the **1d** in CDCl<sub>3</sub> at 298 K on a 300 MHz spectrometer (red X corresponds to chloroform).

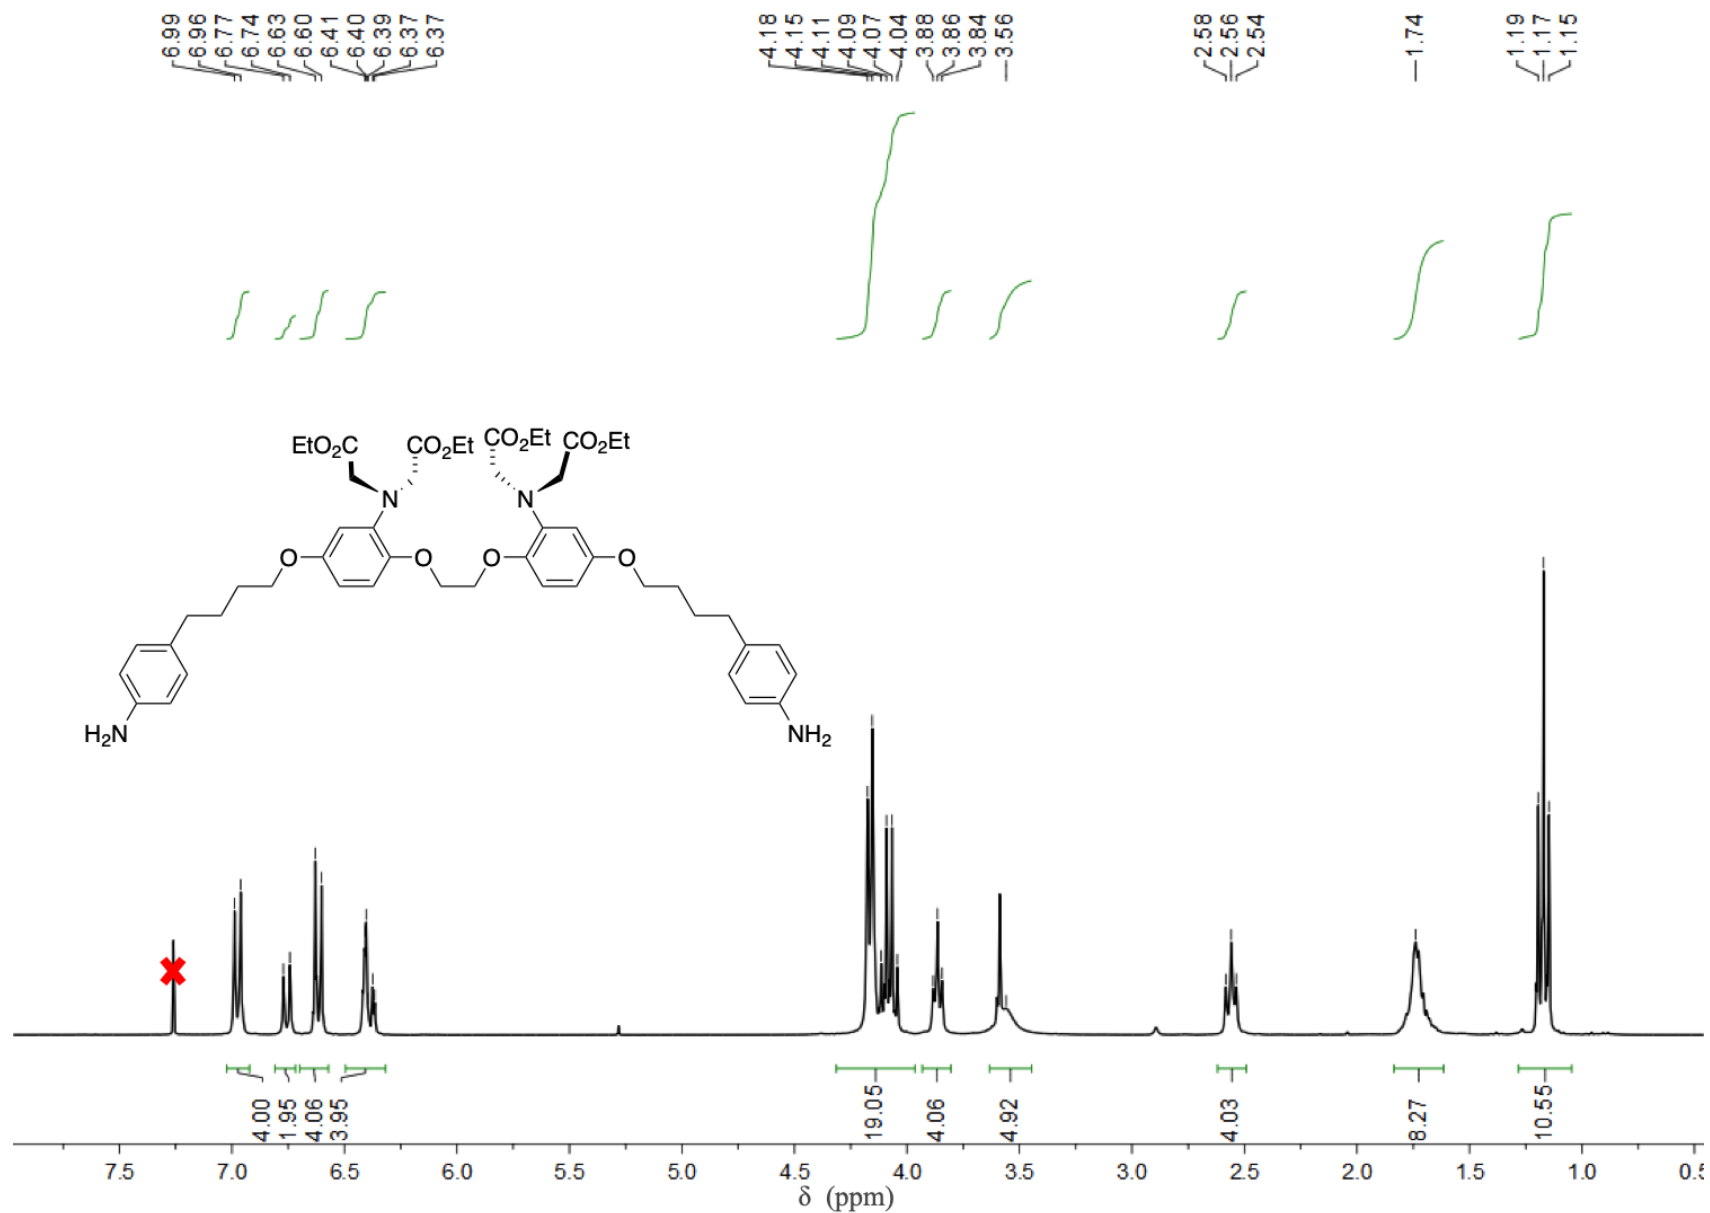

**Figure S10:** <sup>1</sup>H NMR spectrum of the **1e** in CDCl<sub>3</sub> at 298 K on a 300 MHz spectrometer (red X corresponds to chloroform).

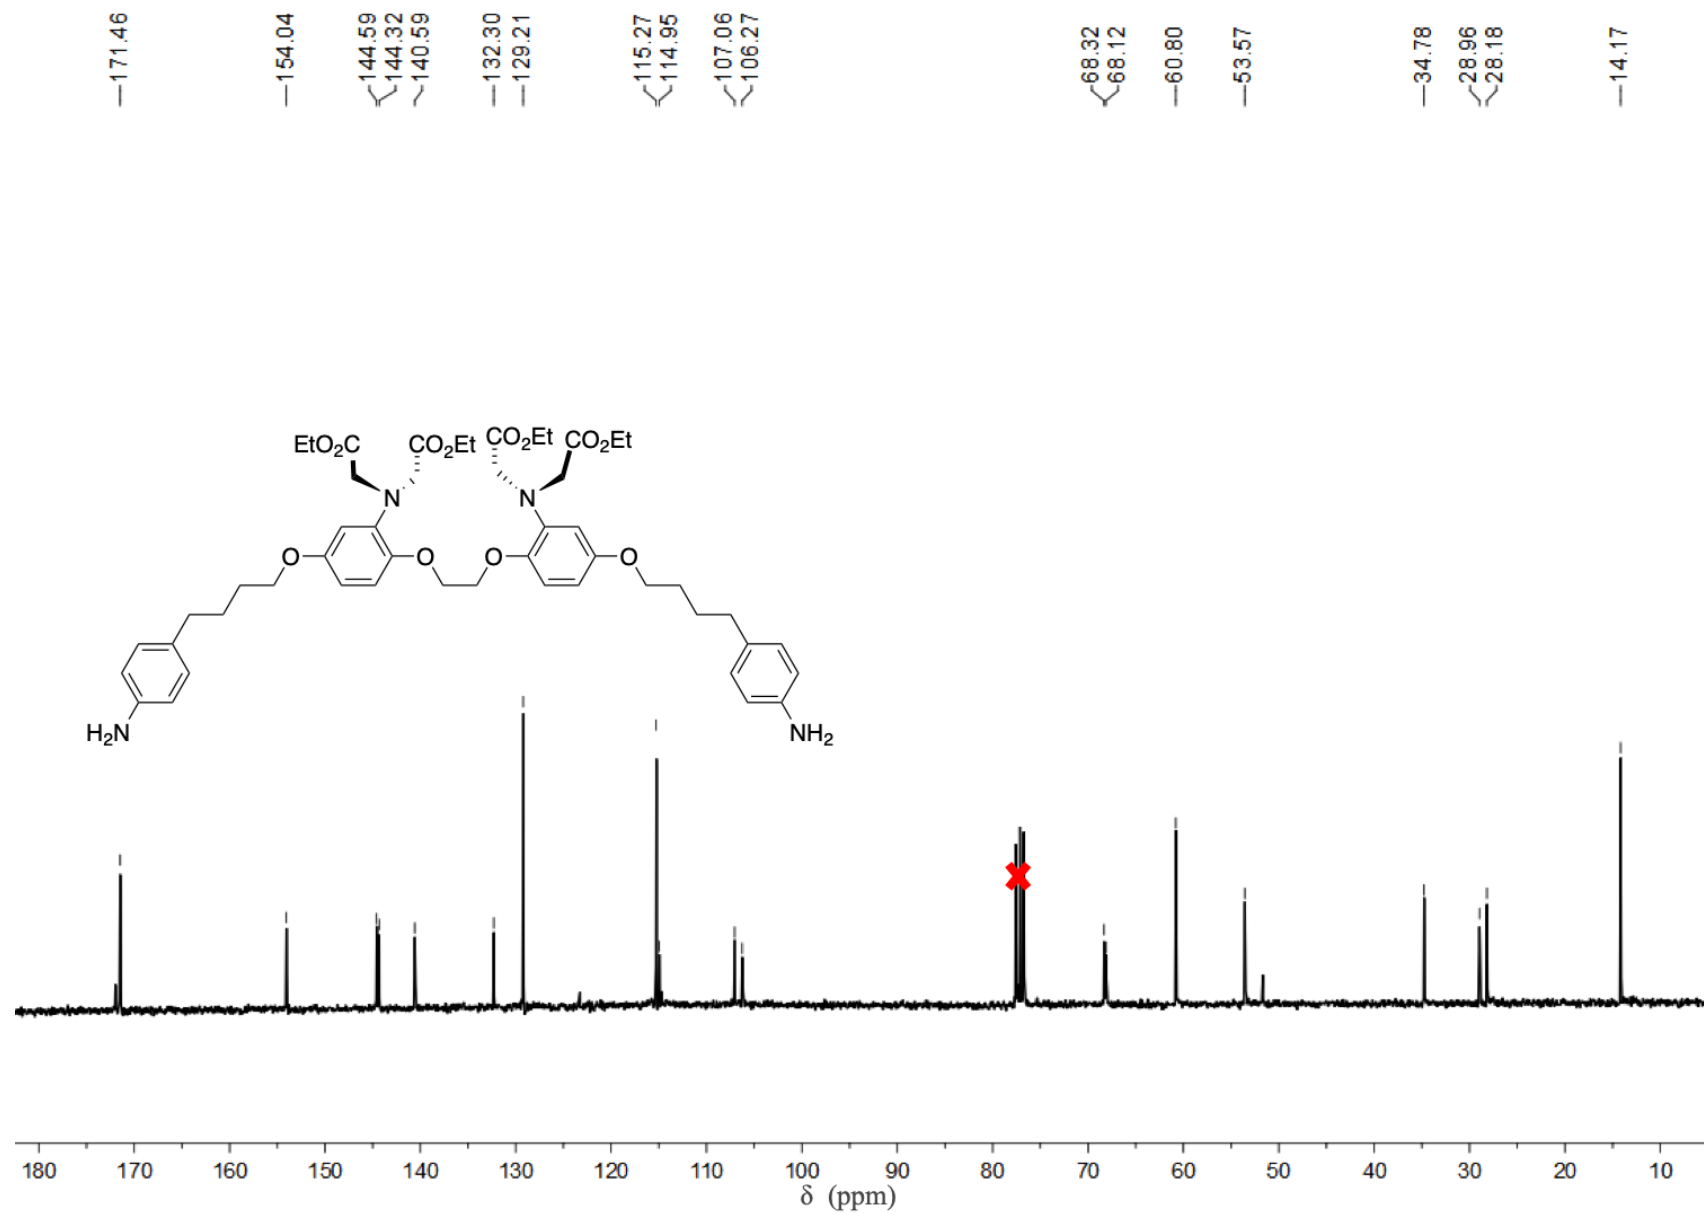

**Figure S11:** <sup>13</sup>C NMR spectrum of the **1e** in CDCl<sub>3</sub> at 298 K on a 300 MHz spectrometer (red X corresponds to chloroform).

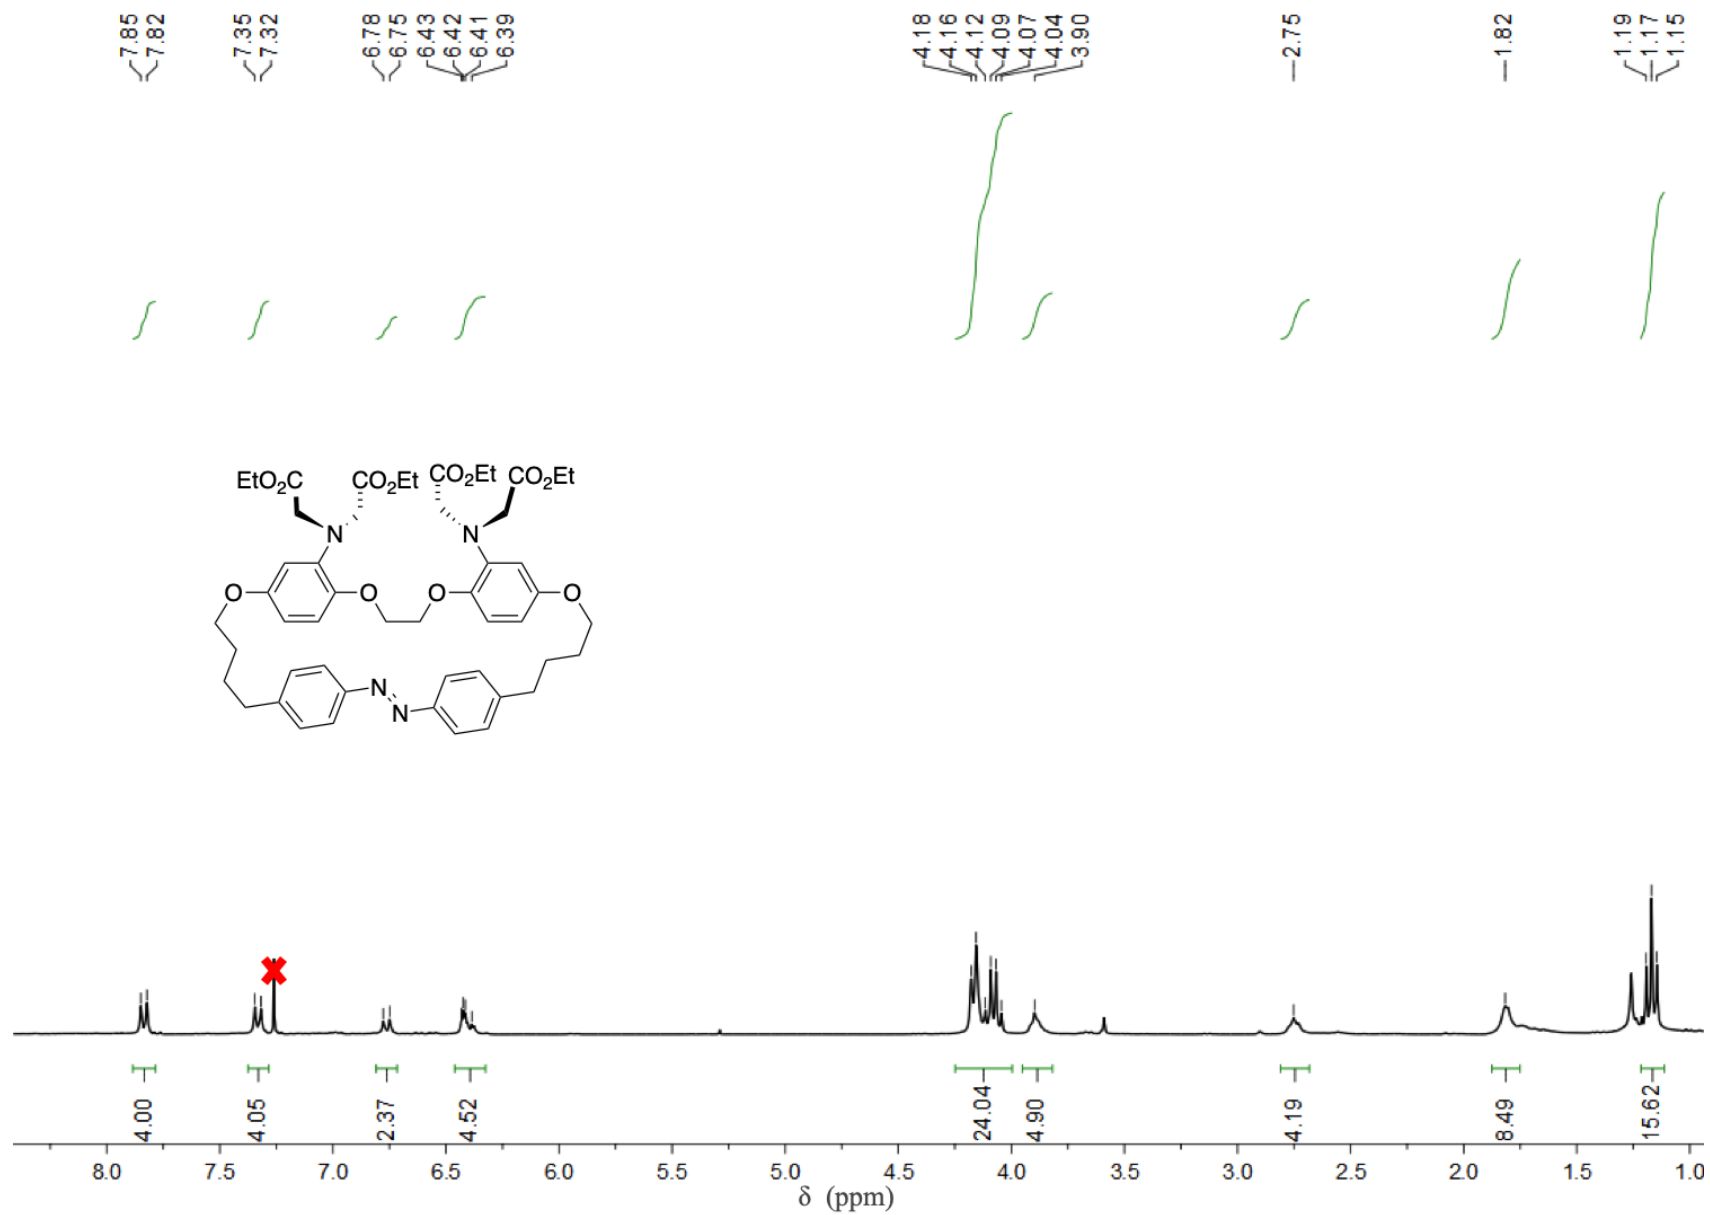

**Figure S12:** <sup>1</sup>H NMR spectrum of the **1f** in CDCl<sub>3</sub> at 298 K on a 300 MHz spectrometer (red X corresponds to chloroform).

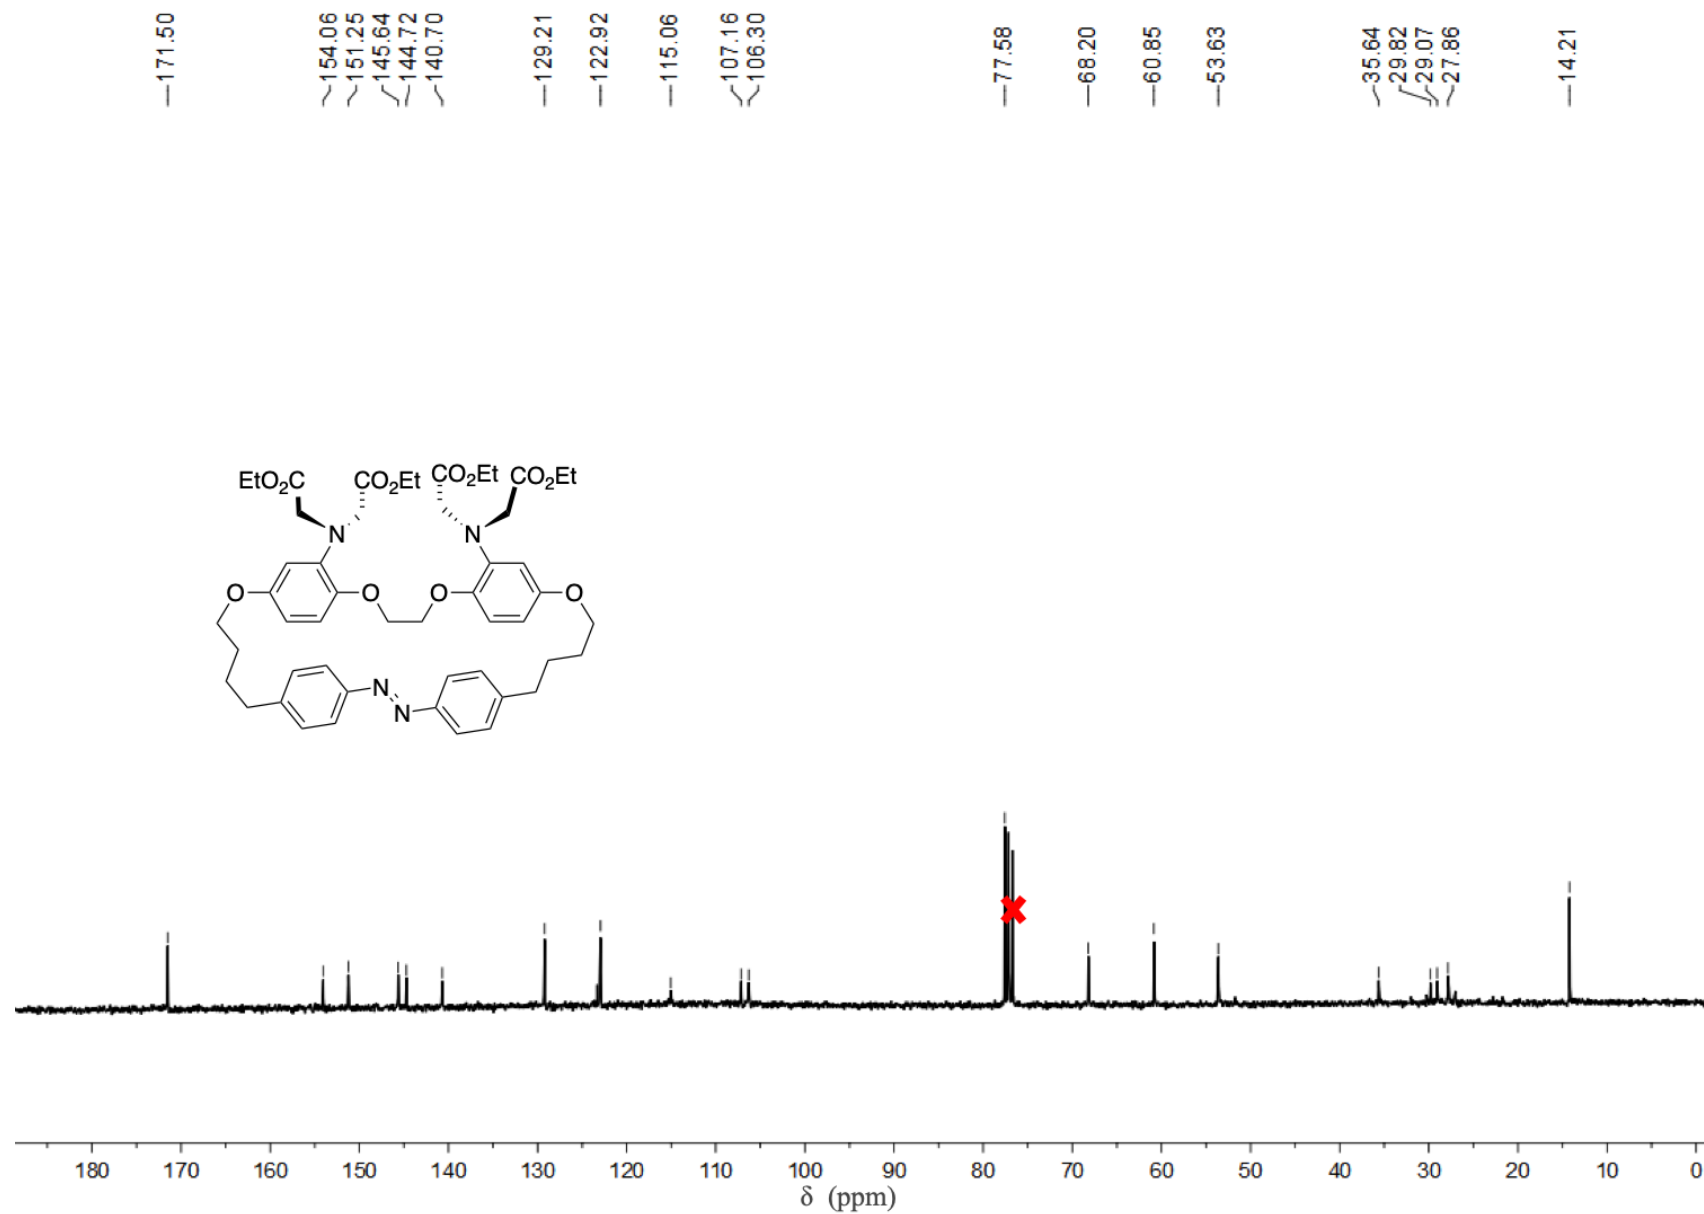

**Figure S13:** <sup>13</sup>C NMR spectrum of the **1f** in CDCl<sub>3</sub> at 298 K on a 300 MHz spectrometer (red X corresponds to chloroform).

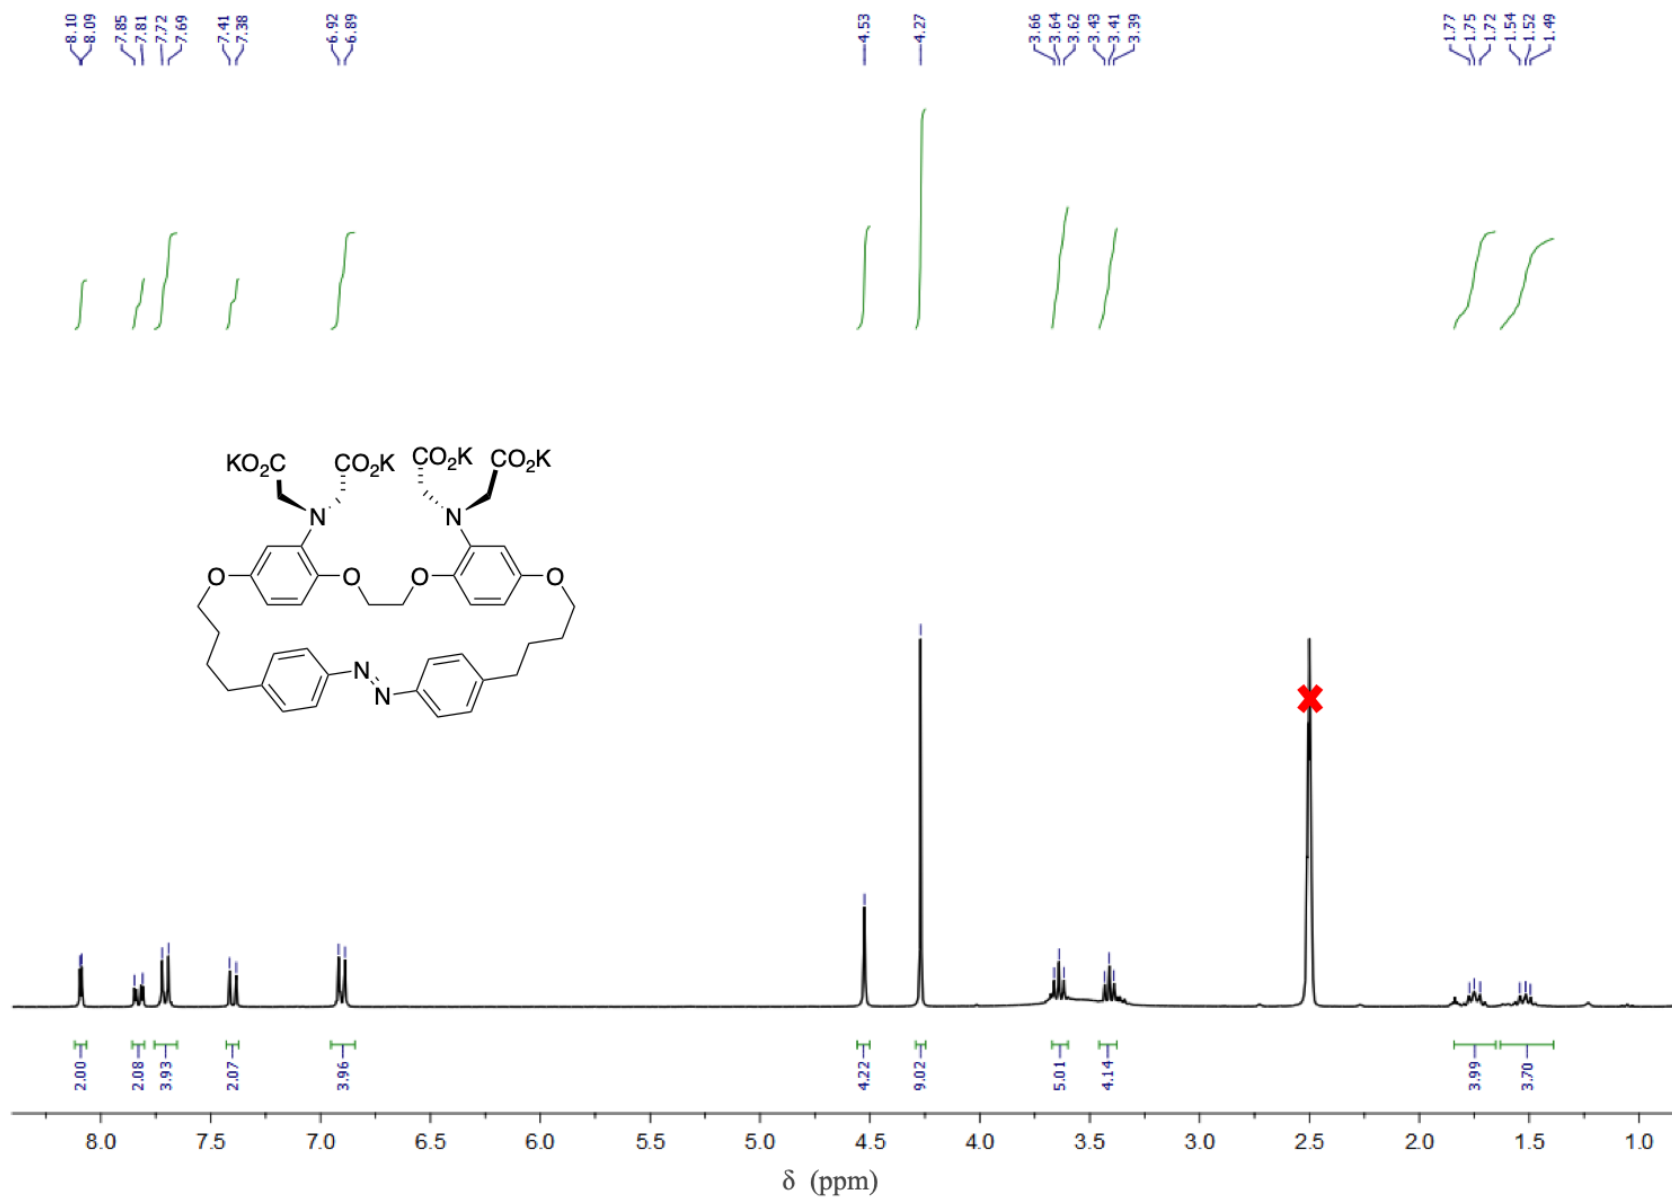

**Figure S14:** <sup>1</sup>H NMR spectrum of the **1** in DMSO-*d*<sub>6</sub> at 298 K on a 300 MHz spectrometer (red X corresponds to DMSO).
